# Supplementary material for: Ensemble Inference and Inferability of Gene Regulatory Networks
Source: PubMed Central journal article supplement (PMC4122380; doi:10.1371/journal.pone.0103812), 2014-08-05
Supplement: pone.0103812.s008.pdf [file pone.0103812.s008.pdf]

## Filter Algorithms

### Filter for $\tilde{G}^L$

The filter algorithm below is designed to prevent the propagation of FP edges in any  $\underline{G}_{\{i\}}$  to the lower bound  $\tilde{G}^L$ . The pseudocode for the union with filter  $\dot{\cup}$  is given below:

```

Adj( $\tilde{G}^L$ ) = Adj( $\tilde{G}_\emptyset$ )
A = Acc( $\widetilde{G}_\emptyset$ )
FOR every k
   $A_{test} = \sum_{i \in V_{KO}^k} A_i \otimes A^i$ 
  Adj( $\tilde{G}^L$ ) = Adj( $\tilde{G}^L$ ) +  $A_{test} \odot$  Adj( $\underline{G}_{V_{KO}^k}$ )
END FOR

```

where  $\otimes$  denotes the outer product and  $\odot$  denotes the Hadamard multiplication (element wise multiplication). Note that the elements of the matrices are either 0 or 1, and the addition operation  $+$  denotes a Boolean sum.

### Filter for $\tilde{G}^U$

The following filter is created to avoid propagating FN edges in any  $\tilde{G}_{\{i\}}$  to  $\tilde{G}^U$ . The pseudocode for the intersection with filter  $\dot{\cap}$  is given below:

```

Adj( $\tilde{G}^U$ ) = Acc( $\widetilde{G}_\emptyset$ )
A = Acc( $\widetilde{G}_\emptyset$ )
FOR every k
   $A_{test} = \sum_{i \in V_{KO}^k} A_i \otimes A^i$ 
  Adj( $\tilde{G}^U$ ) = Adj( $\tilde{G}^U$ )  $\odot$   $A_{test} \odot$  Adj( $\tilde{G}_{V_{KO}^k}$ )
END FOR

```
